# Supplementary material for: A score to predict short-term risk of COPD exacerbations (SCOPEX)
Source: PubMed Central journal article supplement — Int J Chron Obstruct Pulmon Dis. 2015 Jan 27;10:201–9. doi: 10.2147/COPD.S69589 (PMC4315304; doi:10.2147/copd.s69589), 2015-01-27
Supplement: copd-10-201-s001_figures.pdf [file copd-10-201-s001_figures.pdf]

## Supplementary figures

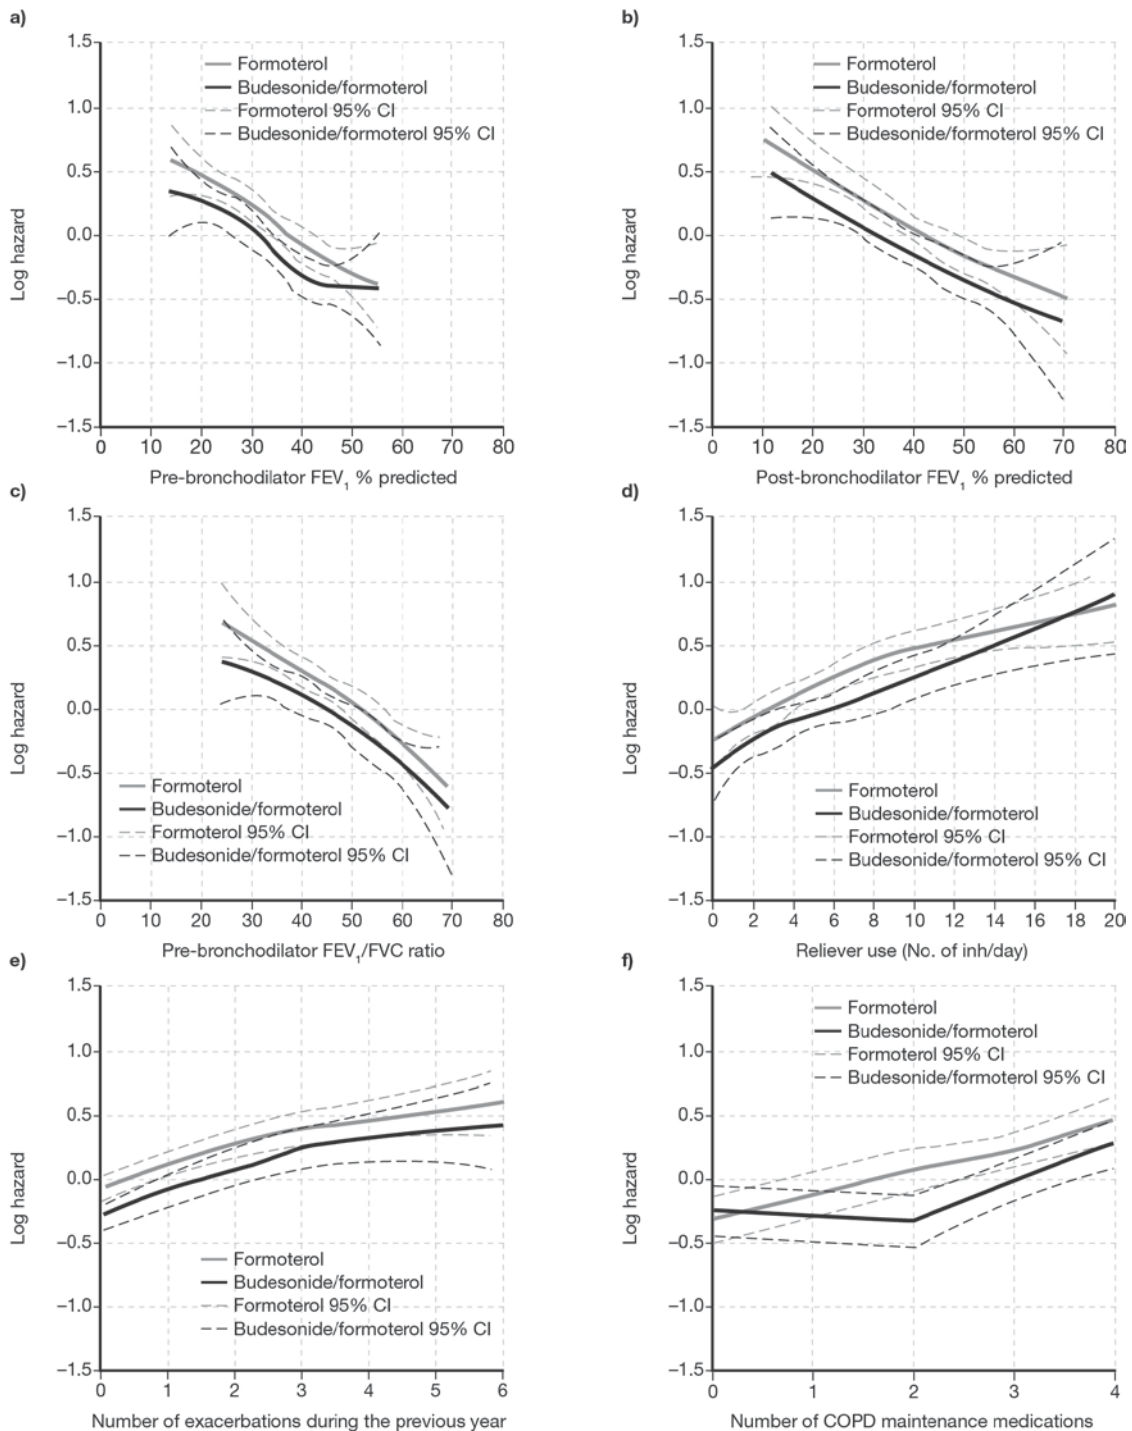

**Figure 1** Baseline continuous variables (a) pre-bronchodilator FEV<sub>1</sub>, (b) post-bronchodilator FEV<sub>1</sub> (c) pre-bronchodilator FEV<sub>1</sub>/FVC ratio, (d) reliever use, (e) number of exacerbations in the previous year and (f) number of COPD maintenance medications as spline predictors for log

odds of a COPD exacerbation. Number of COPD maintenance medications at study entry: 0 = no maintenance treatment with LA (long-acting  $\beta_2$ -agonists, long-acting antimuscarinics, and theophylline), ICS, or other daily treatments (i.e., short-acting [ $\beta_2$ -agonist or antimuscarinic] bronchodilators only), 1 = one maintenance medication, 2 = two maintenance medications, 3 = three or more maintenance medications.

**Abbreviations:** CI, confidence interval; ICS, inhaled corticosteroid; LA, long-acting bronchodilator.

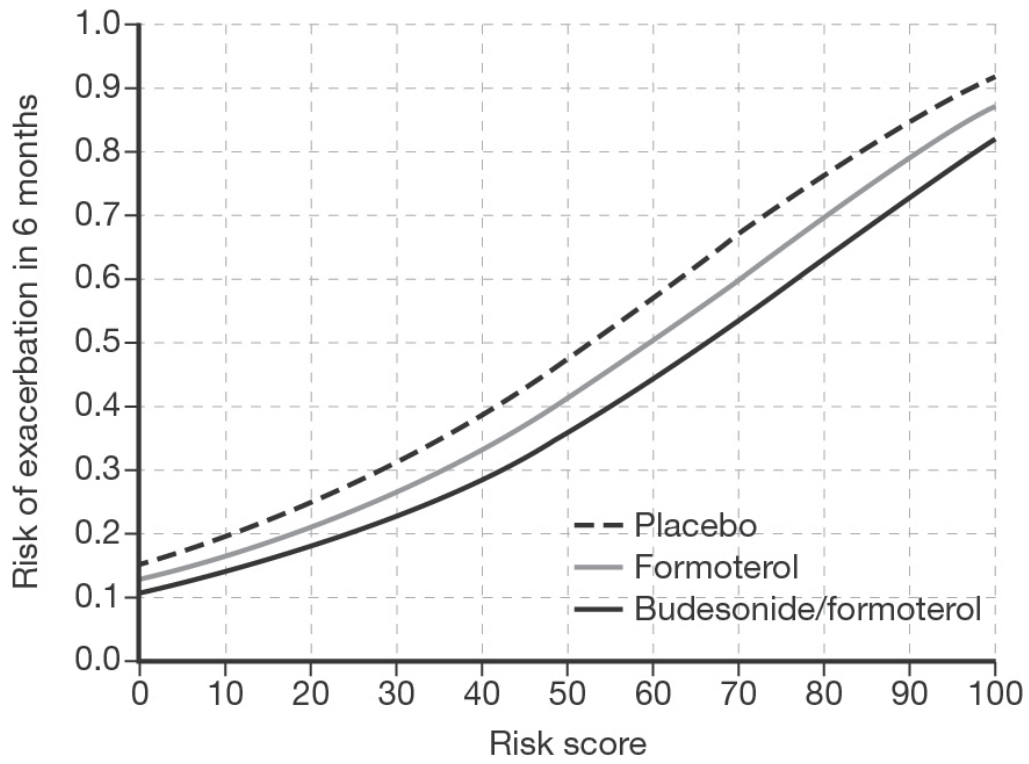

**Figure 2** Risk of exacerbation of chronic obstructive pulmonary disease in 6 months based on baseline risk score for each treatment group with post-bronchodilator forced expiratory volume in 1 second.
