# Supplementary material for: A score to predict short-term risk of COPD exacerbations (SCOPEX)
Source: PubMed Central journal article supplement — Int J Chron Obstruct Pulmon Dis. 2015 Jan 27;10:201–9. doi: 10.2147/COPD.S69589 (PMC4315304; doi:10.2147/copd.s69589), 2015-01-27
Supplement: copd-10-201-s001_tables.pdf [file copd-10-201-s001_tables.pdf]

## Supplementary tables

**Table 1** Univariate analysis of predictors for COPD exacerbations according to p-value rank

| Baseline variable                                                      | HR   | 95% CI    |
|------------------------------------------------------------------------|------|-----------|
| <i>Baseline variables with P &lt; 0.001</i>                            |      |           |
| Reliever use                                                           |      |           |
| During the day                                                         | 1.08 | 1.06–1.10 |
| Reliever use during the night                                          | 1.11 | 1.06–1.15 |
| No. of inhalations per day                                             | 1.06 | 1.05–1.07 |
| Lung function parameters                                               |      |           |
| Pre-bronchodilator FEV <sub>1</sub> /FVC ratio (per 10% increase), %   | 0.80 | 0.76–0.85 |
| Pre-bronchodilator FEV <sub>1</sub> (per 10% increase in % predicted)  | 0.80 | 0.75–0.84 |
| Post-bronchodilator FEV <sub>1</sub> (per 10% increase in % predicted) | 0.83 | 0.79–0.87 |
| FEV <sub>1</sub> reversibility (per 10% increase)                      | 0.72 | 0.60–0.85 |
| Morning PEF (10% predicted) <sup>a</sup>                               | 0.86 | 0.82–0.90 |
| Evening PEF (10% predicted) <sup>a</sup>                               | 0.87 | 0.84–0.91 |
| SGRQ scores (per 10-point increase)                                    |      |           |
| Total score                                                            | 1.10 | 1.06–1.14 |
| Activity score                                                         | 1.11 | 1.07–1.15 |
| Impact score                                                           | 1.06 | 1.03–1.09 |
| Symptom score                                                          | 1.06 | 1.03–1.10 |
| Number of exacerbations in the previous year                           |      |           |
| 2 vs 1                                                                 | 1.43 | 1.25–1.65 |
| 3 vs 1                                                                 | 1.71 | 1.40–2.09 |
| 4 vs 1                                                                 | 1.76 | 1.34–2.31 |
| > 4 vs 1                                                               | 2.22 | 1.67–2.96 |
| Number of COPD maintenance medications at study entry <sup>a</sup>     |      |           |
| 1 vs 0                                                                 | 1.15 | 0.96–1.39 |
| 2 vs 0                                                                 | 1.54 | 1.31–1.82 |
| 3 vs 0                                                                 | 1.94 | 1.62–2.32 |
| BCSS score (0–4)                                                       | 1.29 | 1.18–1.40 |
| MMRC scale score                                                       |      |           |
| 3 vs 2                                                                 | 0.33 | 0.08–1.34 |
| 4 vs 2                                                                 | 0.36 | 0.09–1.42 |
| 5 vs 2                                                                 | 0.48 | 0.12–1.91 |
| Unknown vs 2                                                           | 0.55 | 0.13–2.26 |
| Pulse (per 10-bmp increase)                                            | 1.12 | 1.06–1.18 |
| Sex (female vs male)                                                   | 1.25 | 1.11–1.41 |
| <i>Baseline variables with 0.001 &lt; P &lt; 0.01</i>                  |      |           |
| Depression or anxiety (presence vs absence)                            | 1.24 | 1.07–1.44 |
| <i>Baseline variables with 0.01 &lt; P &lt; 0.05</i>                   |      |           |
| Smoking history (per increase of 10 pack-years)                        | 1.03 | 1.01–1.05 |
| Gastroesophageal reflux disease (presence vs                           | 1.22 | 1.04–1.44 |

|                                                                 |      |           |
|-----------------------------------------------------------------|------|-----------|
| absence)                                                        |      |           |
| Cardiac-related comorbidity (presence vs absence)               | 1.19 | 1.02–1.39 |
| BMI (per 1-kg/m <sup>2</sup> increase)                          | 0.99 | 0.98–1.00 |
| Total symptom score (0–4)                                       | 1.03 | 1.00–1.06 |
| <i><u>Baseline variables with P ≥ 0.05</u></i>                  |      |           |
| No. of comorbidities                                            |      |           |
| 1 vs none                                                       | 1.12 | 0.97–1.29 |
| 2 vs none                                                       | 1.21 | 1.02–1.43 |
| >2 vs none                                                      | 1.28 | 1.03–1.60 |
| Smoking status (current vs ex-smoker)                           | 0.89 | 0.79–1.01 |
| PEF variability                                                 | 1.36 | 0.92–2.01 |
| Age (per 10-year increase)                                      | 1.05 | 0.98–1.12 |
| Diastolic BP (mm Hg)                                            | 1.00 | 0.99–1.00 |
| Sleep symptom score (0–4)                                       | 1.04 | 0.97–1.11 |
| Comedication with ACEI or angiotensin II antagonist (yes vs no) | 0.93 | 0.81–1.07 |
| Time since first COPD symptoms (per 10-year increase)           | 1.04 | 0.96–1.13 |
| Diabetes (presence vs absence)                                  | 1.07 | 0.88–1.31 |
| Comedication with statin (yes vs no)                            | 1.05 | 0.89–1.23 |
| Presence of hypertension (yes vs no)                            | 0.98 | 0.87–1.10 |
| Sputum symptom score (0–4)                                      | 1.01 | 0.94–1.08 |
| Cough symptom score (0–4)                                       | 1.00 | 0.93–1.07 |
| Systolic BP (mm Hg)                                             | 1.00 | 1.00–1.00 |

**Notes:** <sup>a</sup>Number of COPD maintenance medications at study entry: 0 = no maintenance treatment with LA (long-acting  $\beta_2$ -agonists, long-acting antimuscarinics, and theophylline), ICS, or other daily treatments (ie, short-acting [ $\beta_2$ -agonist or antimuscarinic] bronchodilators only), 1 = one maintenance medication, 2 = two maintenance medications, 3 = three or more maintenance medications. Data from.<sup>15-17</sup>

**Abbreviations:** ACEI, angiotensin-converting enzyme inhibitor; BCSS, Breathlessness, Cough, and Sputum Scale; CI, confidence interval; HR, hazard ratio; ICS, inhaled corticosteroids; LA, long-acting bronchodilators; MMRC, Modified Medical Research Council; SGRQ, St George's Respiratory Questionnaire; vs, versus.

**Table 2** Backwards selection model by Cox regression analysis of predictors for severe COPD exacerbations for all patients,<sup>15-17</sup> replacing the pre-bronchodilator FEV<sub>1</sub>/FVC ratio with post-bronchodilator FEV<sub>1</sub><sup>a</sup>

| Baseline variables                                                 | HR   | 95% CI    | Overall P-value |
|--------------------------------------------------------------------|------|-----------|-----------------|
| Number of COPD maintenance medications at study entry <sup>b</sup> |      |           |                 |
| 3 vs 1-2                                                           | 1.43 | 1.23-1.67 | < 0.001         |
| 4 vs 1-2                                                           | 1.82 | 1.52-2.17 |                 |
| Reliever use, no. of inhalations per day                           |      |           |                 |
| 5-10 vs 5                                                          | 1.33 | 0.97-1.38 | < 0.001         |
| ≥10 vs 5                                                           | 1.77 | 1.42-2.14 |                 |
| Exacerbations during the previous year                             |      |           |                 |
| 2 vs 1                                                             | 1.44 | 1.24-1.68 | < 0.001         |
| 3-4 vs 1                                                           | 1.67 | 1.38-2.02 |                 |
| >4 vs 1                                                            | 2.04 | 1.41-2.97 |                 |
| Post-bronchodilator FEV <sub>1</sub> , % predicted                 |      |           |                 |
| 30-49% vs ≥50%                                                     | 1.16 | 0.97-1.38 | < 0.001         |
| <30% vs ≥50%                                                       | 1.75 | 1.42-2.14 |                 |
| Sex, female vs male                                                | 1.30 | 1.13-1.50 | < 0.001         |

**Notes:** <sup>a</sup>Backward selection starting with all predictors and recursively removing those with  $P < 0.001$ . <sup>b</sup>Number of COPD maintenance medications at study entry: 0 = no maintenance treatment with LA (long-acting  $\beta_2$ -agonists, long-acting antimuscarinics, and theophylline), ICS, or other daily treatments (ie, short-acting [ $\beta_2$ -agonist or antimuscarinic] bronchodilators only), 1 = one maintenance medication, 2 = two maintenance medications, 3 = three or more maintenance medications.

**Abbreviations:** CI, confidence interval; HR, hazard ratio; ICS, inhaled corticosteroid; LA, long-acting bronchodilator; vs, versus.

**Table 3** Risk score formula for COPD exacerbation in the next 6 months, replacing the pre-bronchodilator FEV<sub>1</sub>/FVC ratio with post-bronchodilator FEV<sub>1</sub>

| Baseline variable                                   | Score     |
|-----------------------------------------------------|-----------|
| Sex                                                 |           |
| Male                                                | –         |
| Female                                              | 10        |
| Number of COPD maintenance medications <sup>a</sup> |           |
| 0–1                                                 | –         |
| 2                                                   | 13        |
| 3                                                   | 22        |
| Number of exacerbations in previous year            |           |
| 1                                                   | –         |
| 2                                                   | 13        |
| 3–4                                                 | 19        |
| >4                                                  | 26        |
| Post-bronchodilator FEV <sub>1</sub> , % predicted  |           |
| ≥50%                                                | –         |
| 30–49%                                              | 6         |
| <30%                                                | 21        |
| Reliever use, no. of inhalations/day                |           |
| <5                                                  | –         |
| 5–10                                                | 10        |
| <u>≥10</u>                                          | <u>21</u> |

**Notes:** <sup>a</sup>Number of COPD maintenance medications at study entry: 0 = no maintenance treatment with LA (long-acting  $\beta_2$ -agonists, long-acting antimuscarinics, and theophylline), ICS, or other daily treatments (ie, short-acting [ $\beta_2$ -agonist or antimuscarinic] bronchodilators only), 1 = one maintenance medication, 2 = two maintenance medications, 3 = three or more maintenance medications.

**Abbreviations:** ICS, inhaled corticosteroid; LA, long-acting bronchodilator.
